# Supplementary figures and images for: Mte1 interacts with Mph1 and promotes crossover recombination and telomere maintenance
Source: PubMed Central journal article supplement — Genes Dev. 2016 Mar 15;30(6):700–17. doi: 10.1101/gad.276204.115 (PMC4803055; doi:10.1101/gad.276204.115), 2016-03-15

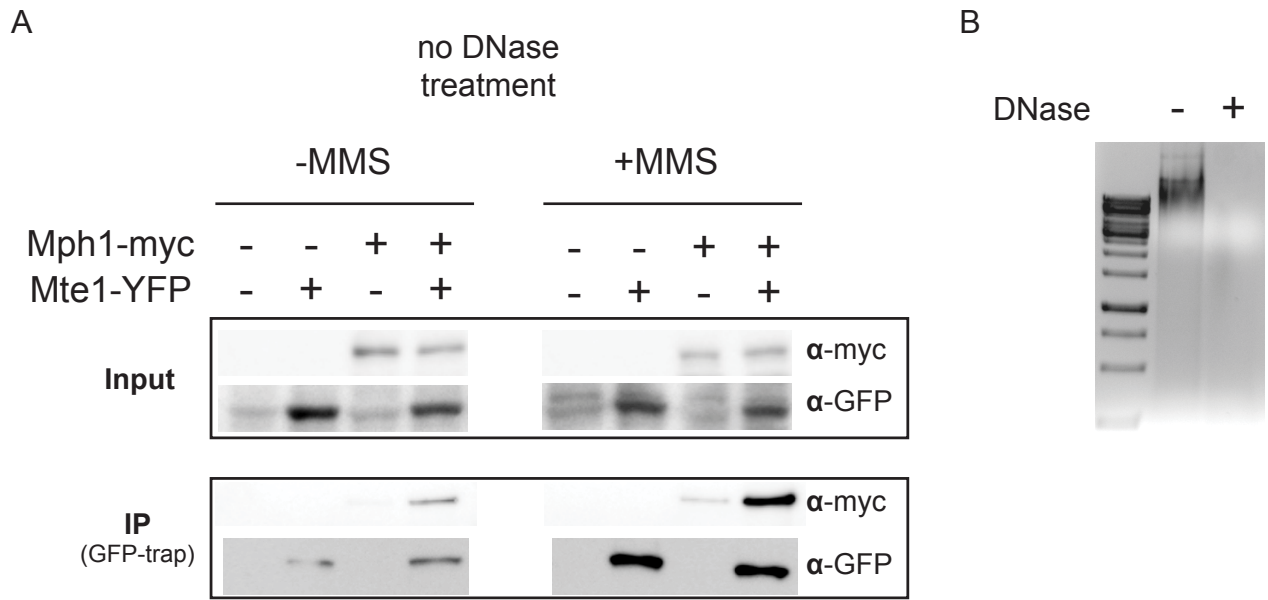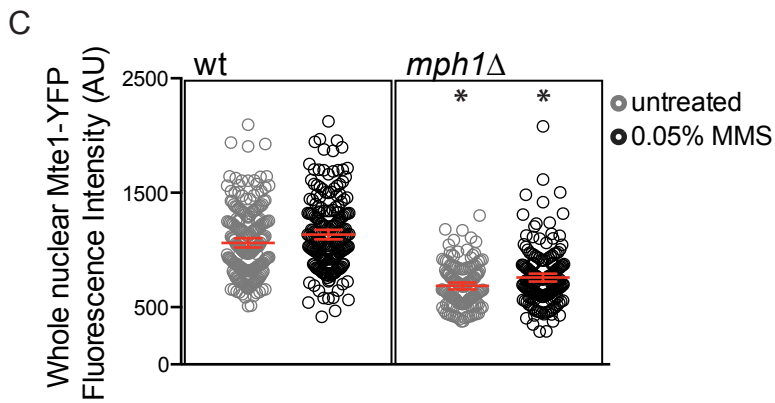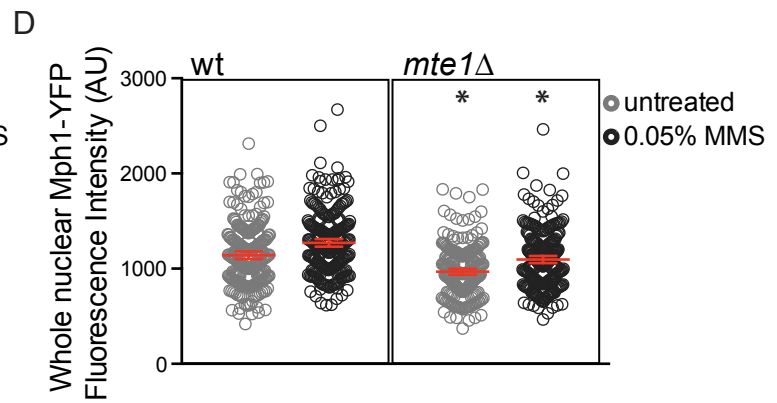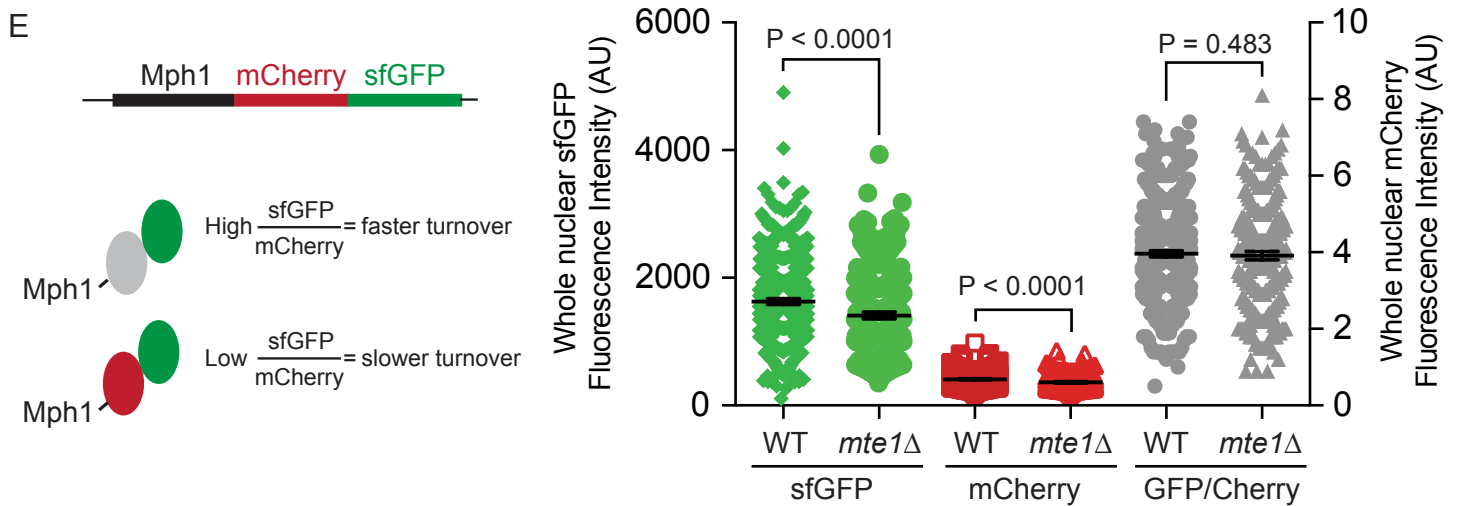

Supplement: supp_gad.276204.115_Supplemental_Figure_1.pdf [file supp_gad.276204.115_Supplemental_Figure_1.pdf]

A

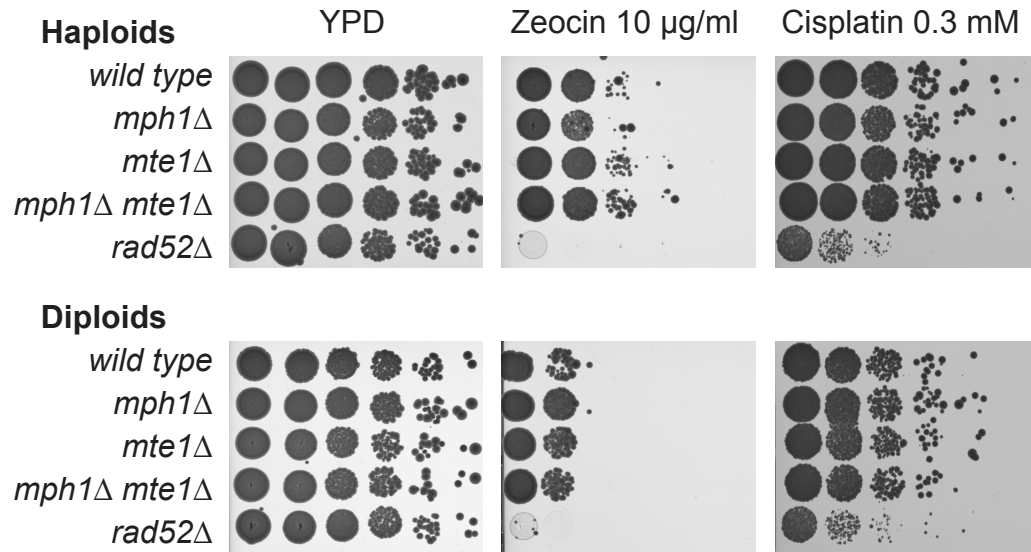

B

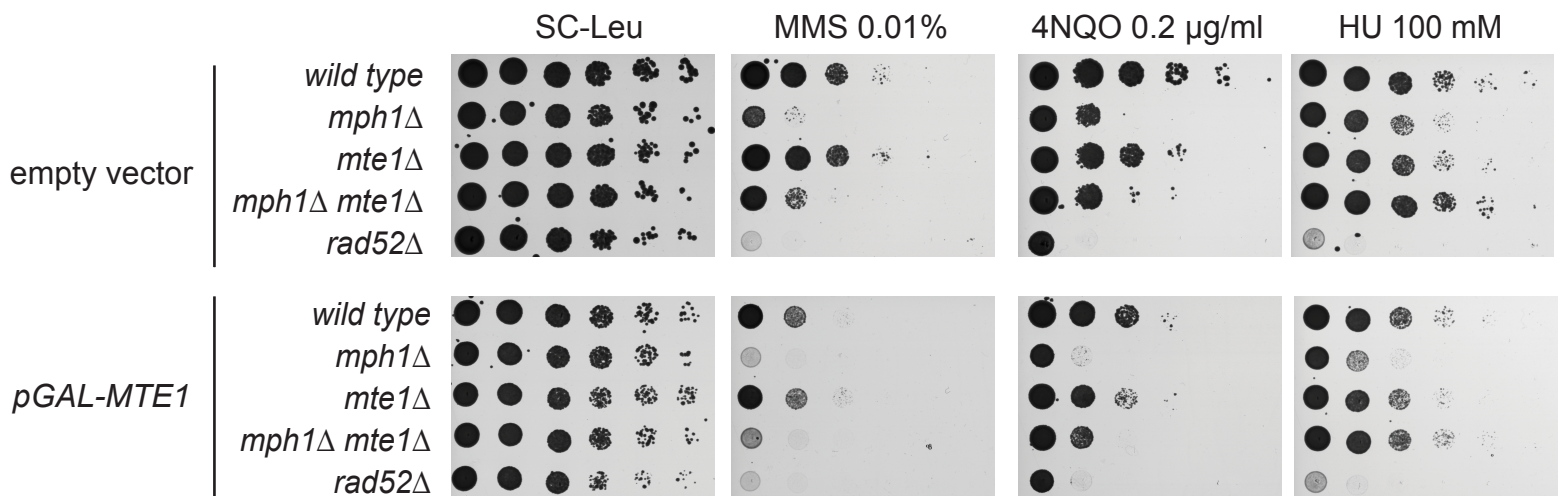

Supplement: supp_gad.276204.115_Supplemental_Figure_2.pdf [file supp_gad.276204.115_Supplemental_Figure_2.pdf]

# Silva\_Supplementary Figure 3

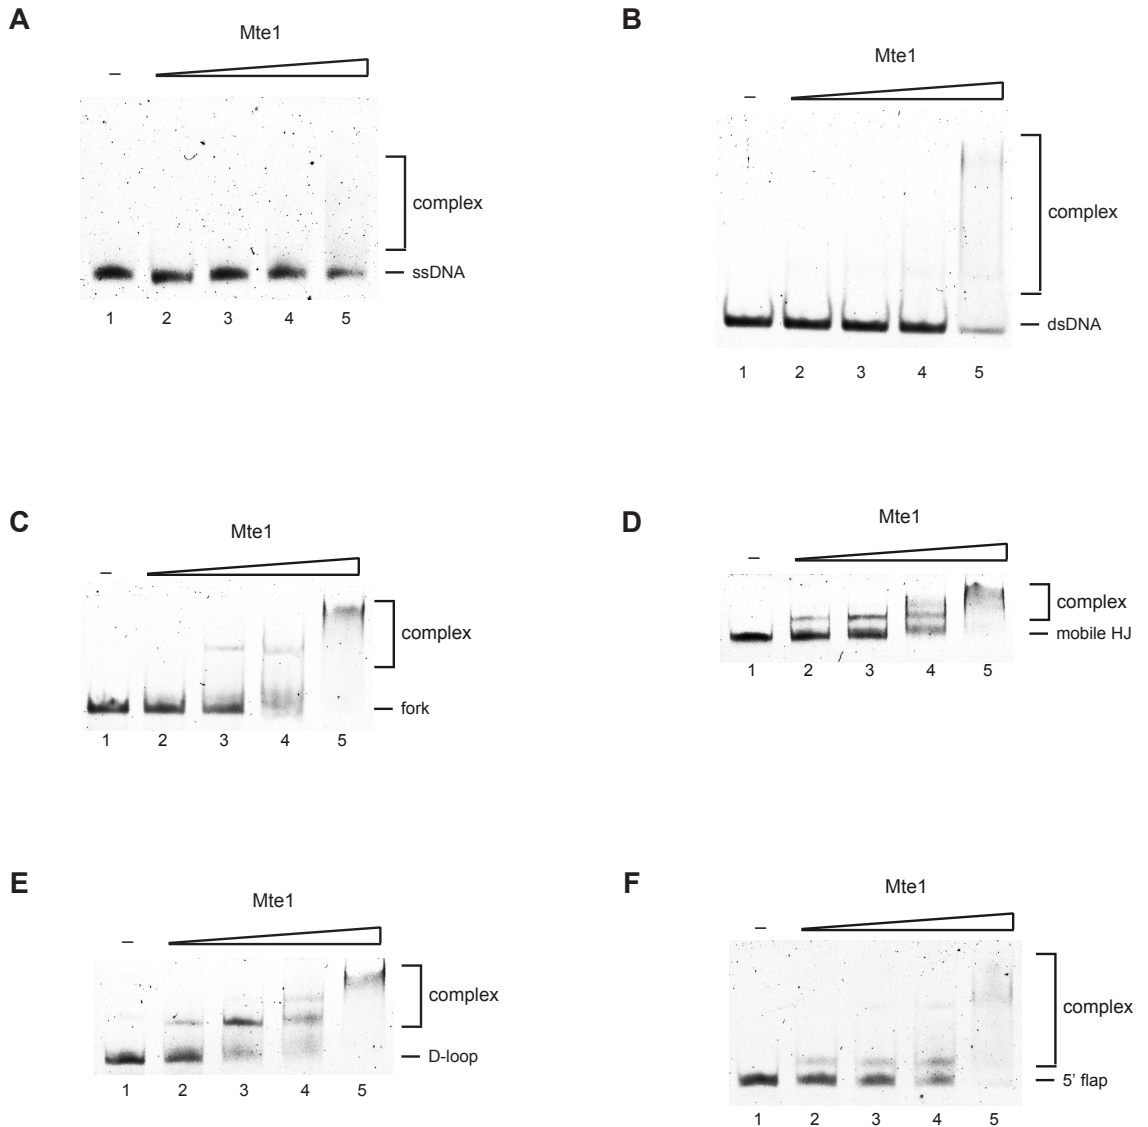

Supplement: supp_gad.276204.115_Supplemental_Figure_3.pdf [file supp_gad.276204.115_Supplemental_Figure_3.pdf]

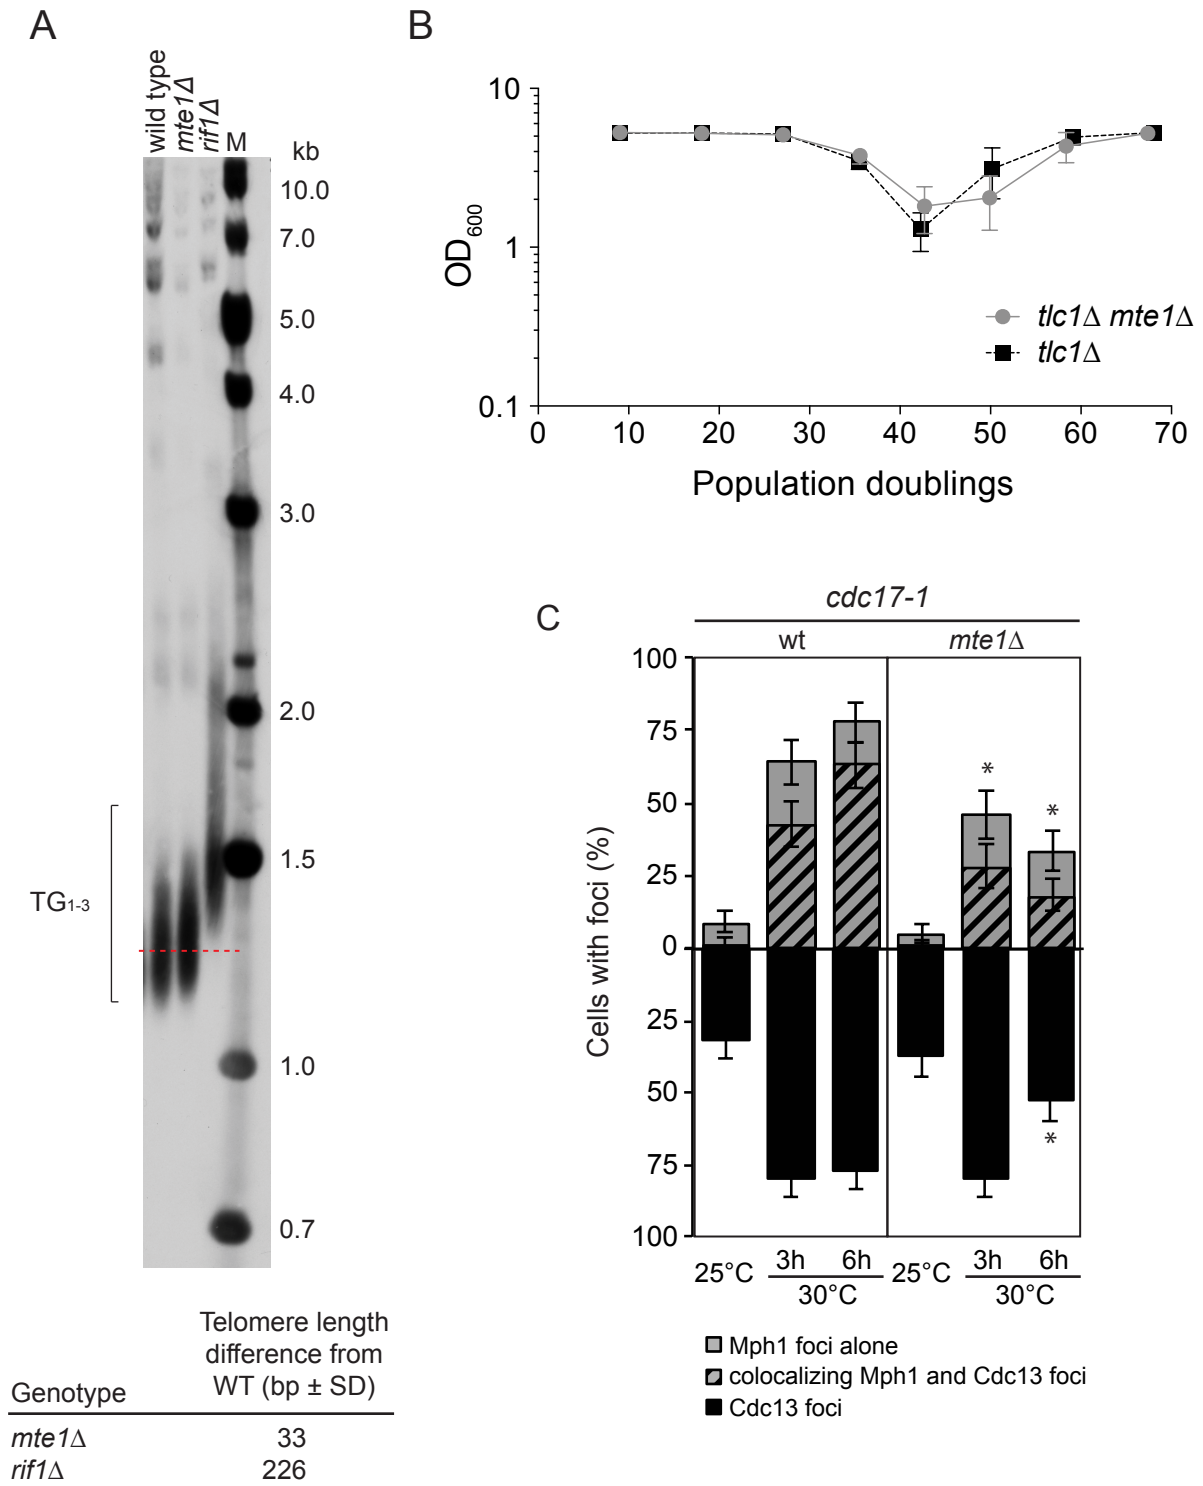

Supplement: supp_gad.276204.115_Supplemental_Figure_5.pdf [file supp_gad.276204.115_Supplemental_Figure_5.pdf]

A

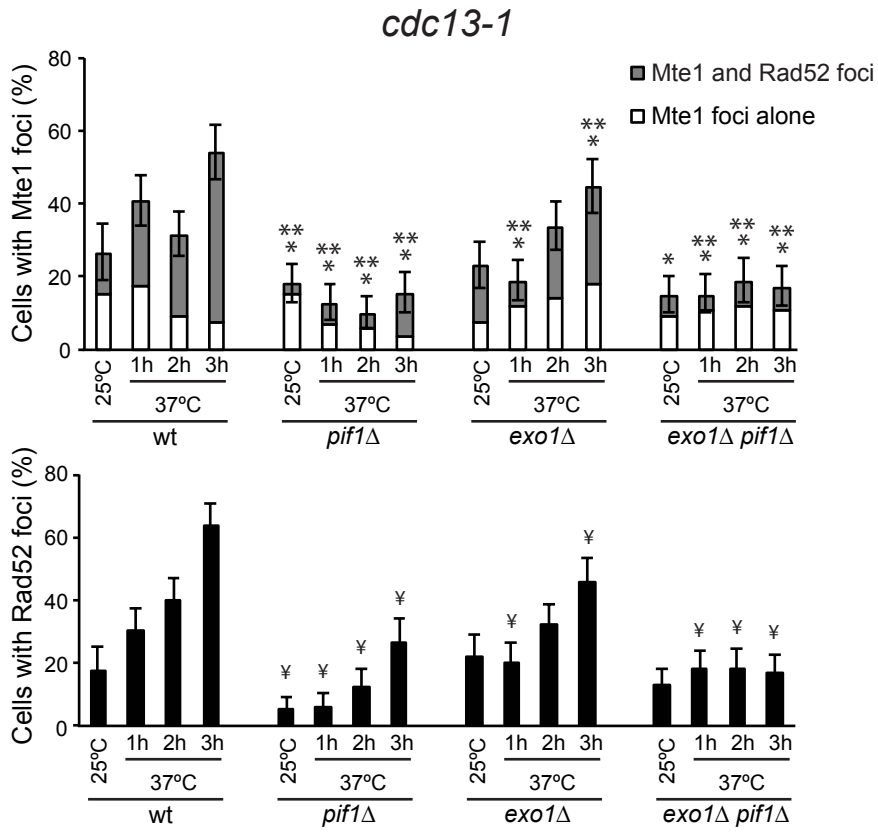

B

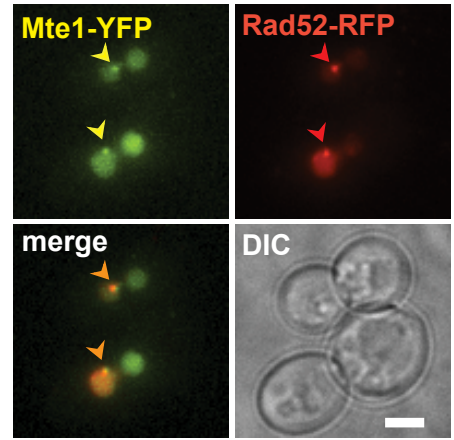

Supplement: supp_gad.276204.115_Supplemental_Figure_6.pdf [file supp_gad.276204.115_Supplemental_Figure_6.pdf]
